# Multiple cell and population-level interactions with mouse embryonic stem cell heterogeneity

Danielle Cannon<sup>1</sup>, Adam M. Corrigan<sup>1</sup>, Agnes Miermont<sup>1</sup>, Patrick McDonel<sup>2</sup> and Jonathan R. Chubb<sup>1</sup>

1. Medical Research Council Laboratory for Molecular Cell Biology and Department of Cell and Developmental Biology, University College London, Gower Street, London, WC1E 6BT, UK

2. Broad Institute of Harvard and MIT, 415 Main Street, Cambridge, MA 02142, USA

Correspondence to [j.chubb@ucl.ac.uk](mailto:j.chubb@ucl.ac.uk)

## Abstract

Much of development and disease concerns the generation of gene expression differences between related cells sharing similar niches. However most analyses of gene expression only assess population and time-averaged levels of steady-state transcription. The mechanisms driving differentiation are buried within snapshots of the average cell, lacking dynamic information and the diverse regulatory history experienced by individual cells. Here we use a quantitative imaging platform with large time series data sets to determine the regulation of developmental gene expression by cell cycle, lineage, motility and environment. We apply this technology to the regulation of the pluripotency gene Nanog, in mouse embryonic stem cells (ESCs). Our data reveal the diversity of cell and population-level interactions with Nanog dynamics and heterogeneity, and how this regulation responds to triggers of pluripotency. Cell cycles are highly heterogeneous and cycle time increases with Nanog reporter expression, with longer, more variable cycle times as cells approach ground state pluripotency. Nanog reporter expression is highly stable over multiple cell generations, with fluctuations within cycles confined by an attractor state. Modeling reveals an environmental component to expression stability, in addition to any cell autonomous behaviour, and we identify interactions of cell density with both cycle behaviour and Nanog. Rex1 expression dynamics showed shared and distinct regulatory effects. Overall our observations of multiple partially overlapping dynamic heterogeneities imply complex cell and environmental regulation of pluripotent cell behaviour, and suggest simple deterministic views of stem cell states are inappropriate.

## Introduction

Spatial and temporal accuracy of gene expression programmes is central to cell choices during differentiation. As cells grow and divide, they dilute and turnover their contents and are exposed to intrinsic and extrinsic sources of stochasticity. For cells to differentiate, gene expression programmes must be resistant to these effects, yet reliably integrate appropriate autonomous and external signals. In recent decades, predominant approaches to investigate cell choices have been molecular, with mechanistic understanding emerging from insight into regulation, molecular interactions and effects of specific regulators. Gene regulation by higher scales of organisation- cells and tissues- has been comparatively neglected, with data largely taken from ensemble measures of gene expression from dead cells. These methods lose cell context and cell diversity and cannot monitor the emergence and maintenance of gene expression differences between cells. However, advancements in live imaging and image analysis technologies now permit a more detailed investigation into these different levels of regulation.

To study the dynamics of gene expression states in cell lineages, we investigate the heterogeneity in pluripotency factor expression in mouse embryonic stem cells (mESCs). Expression of proteins such as Nanog, Rex1 and Stella is highly heterogeneous in mESCs (Chambers et al., 2007; Hayashi et al., 2008; Toyooka et al., 2008). For Nanog, expression is bimodal, with high and low local maxima (Chambers et al., 2007). Nanog expression relates to phenotypic behaviour, with low expressing cells showing tendency to differentiate and high cells tending towards self-renewal (Chambers et al., 2007; Abranches et al., 2014). Treatment of ESCs with 2i inhibitors (Ying et al., 2008) favours self-renewal, and shifts Nanog expression towards a unimodal high distribution. In culture containing serum and LIF, cells can fluctuate between high and low states (Chambers et al., 2007; Kalmar et al., 2009; Miyanari and Torres-Padilla, 2012; Abranches et al., 2014; Singer et al., 2014) making it a potentially excellent culture system for understanding the mechanisms of how gene expression differences arise between cells. Despite several studies on “spontaneous” fluctuations of Nanog, triggers for the spontaneous switching are not known, necessitating a more comprehensive investigation of the regulatory influences governing expression.

We propose key regulation of pluripotency factor expression will be identifiable in the dynamic behaviour of cells and their niche. Cell cycle dynamics are intimately associated with cell fate choice in many systems (Budirahardja and Gonczy, 2009). Is ESC cell cycle behaviour a determinant of gene expression? In mESCs, treatments prolonging cell cycles do

not perceptibly alter expression of pluripotency genes such as *Nanog* (Li et al., 2012; Li and Kirschner, 2014). However, although early embryonic cell cycles can be highly synchronous, many eukaryotic cycles are highly heterogeneous (Brooks, 1981; Di Talia et al., 2007; Muramoto and Chubb, 2008), and with different signaling associated with different cycle stages, cycle variability potentially provides a driver of gene expression heterogeneity. The heterogeneity of the ESC cycle has not been determined. Other sources of heterogeneity come from cell history and environment. How does past behaviour of a cell influence future gene expression choices? Different cells have different neighbours, so potentially experience different signals and mechanical triggers. Standard ensemble or static measures of gene expression do not register dynamic cell properties such as cell cycle behaviour, cell history and environmental dynamics, and perturbation experiments often confound analysis due to the complexity of molecular interactions regulating most cellular processes.

To determine the contributions of cell and population-level processes to pluripotency factor gene expression, we investigated the regulation of *Nanog* expression using high-content imaging of multiple generations of unperturbed mESCs. Our large-scale data approach reveals the complexity of interactions underlying *Nanog* expression dynamics. We identify interactions between *Nanog* reporter expression, cell cycle and cell density, and reveal how expression is confined into an attractor state. We address how coupling between cellular processes is modulated during the transition to the pluripotent ground state. Finally, we introduce a new technique to distinguish cell autonomous and non-autonomous regulation of cellular choices without experimental perturbation. Our approaches are generally applicable to understanding the regulation of gene expression decisions and cell behaviour in development.

## Results

### *Cell Cycle dynamics and pluripotency factor expression*

To image fluctuations in pluripotency factor gene expression along cell lineages, we used TNGA cells (Chambers et al., 2007) which have GFP inserted directly after the Nanog translational start codon. We chose a stable GFP reporter, which is ideal for observation of long term fluctuations of gene expression within complete cell cycles and along cell lineages, appropriate for a gene expressed over 2 days and multiple cell cycles in the early mouse embryo (Chambers et al., 2003). A destabilized GFP or direct transcriptional reporter would provide reduced signal-to-noise ratios and require potentially damaging illumination, features unsuitable for quantitative long-term imaging. To facilitate cell tracking, we expressed H2B-mRFP to label nuclei (Figure 1A). Nuclei were tracked to generate large data arrays of coordinates for mother, daughter and granddaughter cells. Coordinates were used to extract the GFP intensity per unit volume at each time point. An example lineage is shown in Figure 1A, with the mother cell indicated by a white arrow, its daughters with yellow arrows and granddaughters with blue. We used large datasets, typically 400-800+ cell lineages per generation per condition. We captured 3 independent experiments, each with 5-7 imaging fields of view for 2 complete generations. We then captured 3 further independent pairwise experiments, each with 6-7 fields of view, comparing daughter lineages in LIF with daughters in LIF/2i.

To determine the relationship between cell cycle dynamics and pluripotency, we first characterized the basic properties of timing and heterogeneity of ESC cell cycles in LIF. Cycle time was highly heterogeneous within cell populations (Figure 1B). Median cycle durations were 11-13 h for daughters and 12-14 h for granddaughters (Figure 1B). The first cycle for cells after addition of 2i-containing media had a longer duration than the corresponding controls (Figure 1C, KS test  $p < 0.0016$ , see SI for statistics). Increased cycle time was also observed after up to 5 passages in 2i, relative to similar aged controls (Figure S1D,  $p < 5.8 \times 10^{-5}$ ) indicating a sustained reduction of doubling rate.

Variability in cell durations can be used to infer general principles of cell cycle regulation (Brooks, 1981), with several mammalian tissue culture lines showing exponential distributions for differences in division time between sister cells, indicating a control step in the cycle crossed at random (the transition probability model). To test if the transition probability model applies to ESCs, we attempted different fits for frequency plots of interdivision time for sister cells, using a single exponential and a more complex function

(Murphy et al., 1984) based upon the Eyring-Stover survival theory (Wullstein et al., 1980) with an environmentally-sensitive parameter  $\tau$  in the exponential term (Figure 1D,E; see SI). We carried out a chi-squared goodness-of-fit test, which is independent of heavy weighted bins, for Eyring-Stover and exponential models. The test rejected the exponential in most experiments. In contrast, the Eyring Stover fit was retained in the majority of cases (See SI). For non-related cells, neither model fit the data. Together these results indicate the transition probability model is a poor descriptor of the ESC cycle and, unlike other mammalian cell lines, there is likely to be more than one critical step controlling transition through the cell cycle. The more reliable Eyring-Stover fit implies a model with environmental regulation of a rate-limiting step. Environmental influences include growth factor signaling, which can be perturbed in mouse ESCs using 2i. Variability in cycle time was slightly increased in cell after multiple passages in 2i (2i/LIF CV =0.29; LIF CV =0.23). Difficulties in tracking late passage 2i-treated cells precluded acquisition of datasets of suitable scale for curve fitting. Instead we considered cells during their first cycle after 2i treatment. These displayed a slightly extended inter-division time (0.43h; Figure 1E). However, this extended interdivision time between sisters is smaller than the overall mean change in cycle times between LIF and 2i/LIF culture (2.2h), implying multiple cell cycle transitions are sensitive to 2i.

Cell cycle slowing is coupled to differentiation in many systems (Budirahardja and Gonczy, 2009), so it was surprising 2i, which reverses differentiation, extended cycles. Studies of cancer stem cell models identified a slow-cycling stem cell state (Sharma et al., 2010). Is pluripotency also a slow-cycling state? To test this in unperturbed cells, we compared cycle time and median Nanog reporter expression (within a cell cycle) for both daughter (Figure 2A-C) and granddaughter (Figure S1E), in standard serum/LIF culture. Relationships between variables are described using Pearson correlation coefficients, which measure the direction and strength of linear dependent relationships between different measurements.

Cycle times were correlated with Nanog reporter expression. Although low expression occurred in both short and long cell cycles, highest levels tended to be in longer cycles. The correlation was weak ( $r=0.13$ ) but significant ( $p= 0.0018$ ) for daughter cells from three independent experiments. A similar correlation was observed for granddaughters ( $r= 0.14$ ,  $p=0.0004$  Figure S1D) and between cycle duration and rate of change of Nanog reporter expression ( $r=0.14$ , Figure 2B,D). Correlations were not cycle phase-dependent as Nanog reporter levels from the first 5h of cycles gave similar correlation values to complete cycles

(Figure 2C) implying Nanog reporter expression is not correlated with cycle time specifically because longer cycles have more time to accumulate GFP. Correlations between reporter expression and cycle duration also occurred following treatment with 2i (Figure 2D). In previous experiments in mESCs, artificial extension of G1 did not alter Nanog levels (Li et al., 2012) and serum level modulation showed a similar resistance of Nanog and Oct4 to loss of growth potential (Li and Kirschner, 2014). Together these data suggest the extended cell cycle effects we observed are a feature rather than a driver of enhanced pluripotency.

Interactions between expression and cell cycle do not occur for all pluripotency regulators. The Rex1 transcription factor is also heterogeneously expressed in mESCs. We tested whether a reporter cell line (OCRG9) with GFP inserted into the Rex1 coding sequence (Toyooka et al., 2008) revealed connections between expression and cycle time. The observed correlation value was -0.005 (Figure 2E; n=434; 3 repeats). Coherence of Nanog and Rex1 expression has been observed (Toyooka et al., 2008; Singer et al., 2014) although coherence was only partial, so our observations of differences between Rex1 and Nanog in cell cycle coupling may reflect gene specific differences.

A recent report using TNGA cells suggested disparities between GFP and endogenous Nanog expression (Faddah et al., 2013), with poor correspondence for the GFP-negative population, although the GFP-positive population represented Nanog protein very well. We observed a moderate overall correlation between GFP and Nanog protein levels ( $r=0.40$ ,  $n=349$  cells, Figure S1F), however, in agreement with Faddah, the GFP- population was poorly correlated with Nanog protein levels. Independently considering the GFP+ population elevated the correlation with Nanog protein levels ( $r=0.56$ ,  $p=1 \times 10^{-19}$ ,  $n=226$  cells). Given the measurement noise inherent in comparing two different fluorescent channels, this correlation reflects a lower bound estimate. These data, together with the Faddah study, indicate the GFP+ population is a good measure of Nanog protein levels. To test the effect of the GFP- population on our live imaging data, we repeated the analysis with GFP- cells screened from the data. The correlations between expression and cycle time were 0.18 ( $p=0.0001$ ) for whole cycles and 0.19 ( $p=5 \times 10^{-5}$ ) for the first 5h of cycles. After 2i addition, correlations were 0.22 ( $p=3 \times 10^{-7}$ ) for full cycles and 0.13 ( $p=0.0004$ ) for the first 5h. The unchanged correlation values imply the interactions between GFP and cell cycle in the TNGAs are not a consequence of the GFP- population.

*Cell state restricts Nanog expression dynamics*

It is not clear how Nanog heterogeneity relates to cell lineage and cell cycle stage and how expression dynamics relate to current expression state. To address these issues, we mapped expression and cycle times onto cell lineage data (Figure 3A), to identify sources of stability and change.

The intergenerational relationships between cells in lineages are displayed as correlation heatmaps in Figures 3B and C (also Figure S2). Correlations between different members of lineages for cell cycle duration are shown in Figure 3B (highest correlations in red, lowest in blue). More closely related cells had more similar cycle times, with daughter pairs and granddaughter pairs both showing strong correlations ( $r = 0.69 \pm 0.07$  and  $r = 0.66 \pm 0.12$  respectively) and dilution of this similarity down lineages. Restricting analysis to the GFP+ daughters gave a similar correlation ( $r = 0.74 \pm 0.04$ ). Environmental regulation is not clearly apparent here, as granddaughter cousins show lower correlations than granddaughter sisters, although existing at roughly the same time and place. Strongly correlated daughter cycle times were also observed for OCRG9 cells ( $r = 0.69 \pm 0.05$ ). Figure 3C shows a similar analysis for Nanog reporter. All cells within a lineage are very strongly correlated, indicating reporter expression fluctuates very slowly. As with cell cycles, closely related members of a lineage were more correlated than more distantly related cells, however fluctuations within a lineage over 2 complete cycles were small, with mother-daughter pairs having high correlation values ( $r = 0.77 \pm 0.03$ ) and daughter and granddaughter pairs showing yet higher correlations in reporter expression ( $r = 0.91 \pm 0.01$  and  $r = 0.86 \pm 0.05$ , respectively). Restricting analysis to GFP+ daughters also shows a very high correlation ( $r = 0.83 \pm 0.03$ ). Some cells fluctuated more rapidly, in agreement with earlier observations (Kalmar et al., 2009; Abranches et al., 2014), however this behaviour was rare. With a mother-daughter correlation of 0.77, lineage correlations would become undetectable after 6-7 cell cycles (3 days). Repopulation of full Nanog heterogeneity by purified high reporter cells was previously shown to be complete within 6 days (Chambers et al., 2007), suggesting fluctuation dynamics are not enhanced in fractionated populations. Strongly correlated expression in sisters was also observed for Rex1-GFP ( $r = 0.76 \pm 0.09$ ). The timescales indicated by these high correlations between related cells are higher than the range of fluctuation times of around 2 cell cycles reported for cultured human cells (Sigal et al., 2006) and *Dictyostelium* (Muramoto et al., 2010) and in line with recent work using different Nanog reporters in culture (Singer et al., 2014) and early mouse embryos (Xenopoulos et al., 2015).

To gain insight into the origins of the strong correlations in cell behaviour within cell lineages, we considered a simple model, using the observed correlation values between



mothers and daughters. The model generates two daughters from one mother using linear combination of mother data and a Gaussian random variable along with the intergenerational correlation values known experimentally for Nanog ( $r^N = 0.77$ ) and cycle time ( $r^C = 0.6$ ) separately. Sampling pairs of values generated a correlation for Nanog between simulated sister pairs of 0.59 (Supplementary Information) and a cycle correlation of 0.36. Experimentally these correlations are higher, with  $r^N = 0.91$  and  $r^C = 0.69$  for daughter-daughter pairs. These differences between model and data are consistent with a role of the cell environment in stabilizing the gene expression between generations. Alternative models are 1) a latent property of the mother, such as reporter RNA, is inherited to both daughters where it is revealed as an enhanced correlation or 2) mother expression at the point of division may deviate from the median, but will be closer to that of the daughters. Correlations in Nanog and cycle behaviour between sisters were not significantly affected by 2i treatment. In side-by-side experiments,  $r^N = 0.84$  for both 2i/LIF and LIF alone and  $r^C = 0.75$  versus 0.68 respectively. These data indicate the processes repressed by 2i, involving MAP kinase and GSK3 signalling, are not required for intergenerational stability.

Sister cells are highly correlated in expression of Nanog reporter, but correlations fade along cell lineages. At what time in the cell cycle do these differences appear? Fluctuations of reporter expression were measured within individual cycles (Figure 3D). The difference in expression between sisters was small and relatively stable in the first half of cycles but increased more steeply in the second half. These data suggest the first half of the cycle is dominated by maternally expressed protein and RNA, which when diluted out reveals the dynamic behaviour of each daughter. The analysis in Figure 3D is insensitive to fluctuations of both sisters in a correlated manner. To investigate the extent to which sister fluctuations are correlated we used a bivariate mean-squared deviation (MSD) analysis on intensity data, decomposing sister time series into summation ( $D1+D2$ ) and difference components ( $D1-D2$ ). In the case of independent fluctuations the summation and difference MSDs are equal. Differences between summation and difference MSDs reflects the degree to which sister intensity fluctuations are linked. Figure 3E shows the summation and difference components are not equal, with the difference component showing a significantly lower trajectory, indicating sister cell fluctuations are not independent. The slight curvature of the MSD plots suggests confinement, perhaps indicating a restriction on divergence between cells.

How is the directionality of expression fluctuations altered by transition to the pluripotent ground state? Do all cells induce pluripotency gene expression in 2i? Or is the transition dominated by selection, with either death or slower cell cycling of low expressers?

To distinguish between these possibilities, we measured the change in reporter levels in raw difference plots (Figure 3F) showing median changes in GFP for all individual cells. Large changes can be observed in a small percentage of cells, with potential for both up and down transitions. The percentage of down transitions was reduced in the first cell cycle after addition of 2i (Figure 3G). These data imply the transition into ground state pluripotency is an induction rather than a selection. Supporting this view, the positive correlation between cell cycle duration and Nanog reporter (with or without 2i), implies no growth advantage in increasing Nanog. Furthermore, cell death counts in 2i/LIF (15 cells with 822 daughter lineages) were no greater than in LIF alone (24 cell deaths with 754 lineages), implying no widespread purging of sections of the population by 2i.

How does the directionality of fluctuations relate to cell state? We observed that fluctuations in Nanog reporter exhibit a clear directionality that depends upon level at the start of a cell cycle (Figure 3H). We divided cell cycle data into 4 equal quadrants, with quadrant 1 representing the beginning of the cycle and quadrant 4 the end. The change in expression from quadrant 1 to quadrant 4 shows a negative slope when plotted against starting expression (gradient = -0.20; -0.18 for GFP+ cells) (Figure 3H), indicating high expressing cells tend to reduce expression by the end of the cycle, whereas low expressing cells tend to increase expression. This supports the view of ESC culture as an epigenetic “attractor” state (Huang et al., 2005; Huang, 2011). After 2i treatment, the tendency of high expressing cells to lower their expression was reduced (gradient = 0.008; -0.077 for GFP+). During the transition to the ground state- a new attractor- the population will be out of equilibrium and not revert to the initial mean. During this transition, Nanog reporter expression initially decreases in many cells (Figure 3G), sometimes quite substantially, implying heterogeneity in the response to dedifferentiation cues.

#### *Regulation of heterogeneity by local environment*

The simple model described above suggested Nanog and cell cycle regulation by environmental effects. To investigate any local signaling effects, we compared the difference in behaviour between cells as a function of the distance between them. Figures 4A and B show the difference in Nanog reporter between cells as a function of distance for related (red) and unrelated (blue) daughter cell pairs at the beginning (A) and end (B) of cell cycles (also Figure S3A and B). There was no relationship between intercellular distance and GFP ( $r=0.006$ ). The same comparison is shown in Figure 4C and D for cycle durations, revealing no evidence for intracellular distance as a determinant of the difference in cycle duration ( $r=-$

0.023). These data also indicate that daughters that move apart quickly are no more or less similar than those remaining in close proximity. Correlations between intercellular distance and reporter levels/cycle time were also absent in cells treated with 2i. Put together, these data suggest no strong environmental determinants differentiating gene expression and cycle behaviour over the length scale of a field-of-view ( $193.5\mu\text{m}^2$ ).

To investigate the possibility of environmental effects over greater length scales, we compared cell behaviours between individual imaging fields of view. We compared the field-of-view (FOV) average cycle time against FOV average GFP intensity (Figure 4E). The correlation between cycle time and expression was higher in FOV average data ( $r=0.60$ ) than single cell data ( $r=0.13$ , see above) for daughters (3 independent experiments). For the corresponding granddaughters, the correlation value was 0.63. The repeat test (daughters only, 3 independent experiments) gave  $r=0.37$ . After bootstrapping the data by randomizing values between fields, the probability the correlation value of 0.6 between Nanog/cycle duration would occur randomly was 0.018 and 0.12 for  $r=0.37$ . So the increased correlation observed between field-averaged cell cycle and Nanog reporter expression may constitute a weak effect. A recent study by the Daley/Collins labs (Kumar et al., 2014) found individual ESC colonies had homogeneous expression of pluripotency markers, including Nanog, which they interpreted as inheritance of expression states over multiple generations. The differences in magnitude of the effects in our data and the other study may be due to culture conditions. In our serum/LIF culture, most cells grow as a rough monolayer, although compact vertically projecting colonies are occasionally observed. A mathematical model for culture progression from single founder cells, constrained by the inheritance values measured in our study (Figure 4F), suggests high local correlations in cell behaviour would not arise from inheritance. Although the model used high mother-daughter correlation values ( $r=0.77$  for Nanog) the simulated FOV cell cycle-Nanog correlation at our culture densities declined to the level of the single cell correlation by the time the simulated culture was at the cell density used experimentally (Figure 4G). We infer any strong local correlations in cell behaviour would be derived, in part, from local signaling, rather than purely inherited behaviour. We commenced imaging when there were 10-30 cells in a FOV. Based on the cell cycle times we measured in this study, it is unlikely one founder cell in a FOV could generate 10-30 cells between the time of plating and the time of imaging (18h), so our model may overestimate the inheritance component.

Cell movements are an integral part of early mouse development (Plusa et al., 2008), sorting cells out and introducing them to novel stimuli (Xenopoulos et al., 2012), implying cell motility may regulate the heterogeneous behaviours of ESCs. We investigated motility of TNGA cells using mean square displacement (MSD) analysis of distance moved. MSD plots of TNGA cells indicate a more complex model of translocation than random walk diffusion alone. Figure 5A shows MSD as a function of lag between time points. The fit is non-linear and slightly upwardly curving, indicating random walk with flow, perhaps resulting from cells moving into available space, with resistance to motility from increasing cell density at source. Similar trajectories were observed with LIF and LIF/2i. Although the plot suggests enhanced motility of cells in LIF compared to cells entering 2i, suggesting an effect of enhanced local pockets of cell density in 2i, no strong change in diffusion coefficient was observed with data pooled from 3 independent experiments ( $1.13 \mu\text{m}^2/\text{min}$  (LIF) and  $0.98 \mu\text{m}^2/\text{min}$  (LIF/2i)). A slight flattening of the trajectory was observed in some MSD plots, perhaps an effect of the limited size of a FOV. Motility showed weak but significant negative correlations with both cell cycle and Nanog reporter (Figure 5C).

An alternative metric to describe local environment is cell density. Density was calculated by measuring the amount of nuclear red fluorescence within 50 pixel diameter circles centred on cell centroids. We measured correlations for each cell between density and reporter expression at each time point (Figure S3C,D). Peak correlation values were slightly positive, but the spread was high and apparent weak correlations non-significant. However, if we use the median cell density from whole cycles, this showed significant positive correlations with both cell cycle duration and Nanog reporter expression (Figure 5B,C) for daughters ( $r^C = 0.25$ ,  $r^N = 0.34$ ) and granddaughters ( $r^C = 0.18$ ,  $r^N = 0.28$ ). Anti-correlations between density and motility were observed in both LIF and 2i/LIF, likely reflecting obstructions to cell migration. Correlation between Nanog reporter and density were clear in GFP+ cells ( $r=0.26$ ,  $p=1 \times 10^{-8}$ ) and persisted into 2i, and although the link between cell cycle and density was lost in 2i. Similar to Nanog reporter cells, density was correlated both with cycle duration ( $r=0.12$ ,  $p=0.01$ ) and Rex1 reporter expression in OCRG9 cells (Figure 5D,  $r=0.22$ ,  $p = 6 \times 10^{-6}$ ). The implied role of density in the regulation of ESC behaviour may parallel the anecdotal image of the ESC colony with a dense 3D mass of pluripotent cells surrounded by the more flat and polarized differentiating cells. While in our serum/LIF cultures, the structures the cells form are generally monolayer-like, considerable heterogeneity in cell aggregate morphology within a culture does exist.

## Discussion

We have developed a high content imaging and analysis platform for parallel measurement of multiple dynamic cellular and population features of mouse ESCs, together with gene expression, using large data sets. Our analysis revealed mESC cell cycles are highly variable in duration. Analysis of this variability indicated cycles are regulated at multiple transition points, unlike other standard cell lines. High Nanog reporter expression is associated with longer cell cycles, and 2i, which drives pluripotency, increased both cycle duration and variability. Fluctuations in cycle duration and gene expression were slow, with closely related cells retaining very similar cycle times and expression. The expression state of the cell is a strong indicator of its future state, although high expressers tend to reduce their expression and low expressers increase. The cell environment also interacts with Nanog expression and cycle behaviour. Local intercellular signaling interactions are not strong over short timescales, however cell density emerges as a recurrent feature, for both cycle behaviour and pluripotency factor gene expression. The link between density and cycles may be a contact inhibition phenomenon. For density and gene expression, there may be similarity with the early embryo, with Nanog becoming restricted to the inner cell mass, then epiblast (Chambers et al., 2003), which will perceive an increased number of cell-cell contacts than prospective extra-embryonic tissue. Parameterised models underpin the importance of cell-cell coupling in long-term stability of gene expression states. Analysis of expression of the Rex1 pluripotency factor indicated partially overlapping features with Nanog regulation.

Comparing our results with previous studies of Nanog dynamics identifies apparent differences, which can be explained the enhanced scale of our data set, and different approaches used. In an early study using TNGA cells (Kalmar et al., 2009), Nanog showed fast switching between states. While we observed some large fluctuations over timescales of cell cycles, these were infrequent. In this early study cells were flow-sorted before imaging, providing a different population context. A recent study using a destabilized reporter also observed fast fluctuations (Abranches et al., 2014). Stable GFP reporters reveal a time-integrated view of transcription, showing the combined behaviour of several bursts of a destabilized reporter. A recent study imaging endogenous pluripotency factor levels using antibodies and single molecule RNA FISH (Kumar et al., 2014) suggests very low heterogeneity in closely related cells and implies long-term stable transcriptional behaviour, which parallels the stability of Nanog reporter expression in pre-implantation mouse embryos (Xenopoulos et al., 2015) and a recent *in vitro* study (Singer et al., 2014). Recent work also showed no obvious differences in fluctuation range or rate between LIF and LIF/2i

(Abranches et al., 2014; Singer et al., 2014). Our study shows an increase in fluctuation range in  $2i$ , likely explained because we measured the transition to  $2i$ , not the  $2i$  steady state. If the fluctuation range did not alter after  $2i$  treatment, other mechanisms, such as selection, would be required to generate a uniform high Nanog state. We saw no such evidence of selection, with slower cell cycles and no increase in cell death after  $2i$  treatment. The Abranches study observed no bias in mitotic division time related to Nanog reporter level. Our data are consistent with this, although we observed a clear anti-correlation between reporter levels at the beginning of the cell cycle and levels at the end, an observation made clearer by the scale of our data set and the clarity of a stable reporter generating a time-integrated signal.

ESC cell cycle control appears more complex than other mammalian cell culture models. Initial studies on interdivision times between sister cells revealed a single rate limiting transition (Brooks, 1981) for several mammalian cell lines. Subsequent work showed the variability between unrelated cells in a population could be explained by 2 rate-limiting steps (Brooks et al., 1980) or a more complex environmentally-regulated step (Murphy et al., 1984). Our data indicate a single rate-limiting step (the transition probability model) is not sufficient to explain interdivision times of ESC sisters, and that a more complex environmentally regulated model does not fit data from non-related cells in the population. In addition, the increase in interdivision times between sisters in  $2i$  is small compared to the overall increase in cycle time observed in  $2i$ . Together, these data are consistent with a model where ESC cycle progression is actively regulated at multiple phases.

Average cycle durations were increased in high Nanog reporter cells, although high variability in cycle duration was observed in all conditions. Cycle times were further increased after  $2i$ , although longer cell cycles were still associated with cells with higher reporter expression. Differentiation is usually associated with slowing of the cycle, so observing slower cycles for a less differentiated state was initially surprising. Slow-cycling stem cell states were previously inferred in cancer biology, although differences in cycle times (Sharma et al., 2010) are more extreme. Previous studies did not observe change in Nanog expression caused by disruption of growth potential or G1 (Li et al., 2012; Li and Kirschner, 2014). Together, these data indicate longer cell cycles are a feature rather than a cause of the pluripotent state. Frequent use of system-wide regulators such as cell cycle kinases and associated networks may not be compatible with cells remaining in the metastable attractor state proposed for stem cells (Huang, 2011). Consistent with the “attractor” view, cells expressing high levels of the reporter tend to decrease reporter expression. One might view this as an epigenetic barrier, such as the side of one of Waddington’s valleys

(Waddington, 1957) or the wall of an attractor (Huang, 2011) driving reversion to a local mean. The persistence of a significant proportion of the cell population showing overall down transitions following 2i treatment suggests a probabilistic search through the new attractor landscape, not switch-like behaviour. An alternative explanation is the different behaviours after the dedifferentiation stimulus reflect pre-existing heterogeneities in state, inferred as a source of differential IPS reprogramming potential (Pour et al., 2015).

We have identified a variety of cellular and population-level features coupled with Nanog fluctuations. However, most features are highly heterogeneous- our data indicate tendencies, not determinism, which raises the conjecture that “stemness” is unlikely to be explained, or derived, by a “magic bullet”. It will be interesting to see how these conclusions are borne out in other developmental contexts. Our approaches concern the central problem in developmental biology of how cells become different, and these methods are therefore expected to be generically applicable to understanding development in a wide range of systems, and ultimately provide the basis for large-scale dynamic imaging screens to identify the molecular regulators of the interactions and phenomena that have been revealed.



## Materials and Methods

### *Cell culture and imaging*

For imaging Nanog fluctuations, we used TNGA cells (from Austin Smith) (Chambers et al., 2007). To image Rex1 expression, we used OCRG9 cells (from Hitoshi Niwa) (Toyooka et al., 2008). To facilitate cell tracking, cells were stably transformed with a plasmid expressing H2B-mRFP from a PGK promoter. Selection of clones used an IRES-hygromycin cassette downstream of the H2B-mRFP. Cells were cultured in Glasgow Minimal Essential Medium (GMEM, Gibco) with 10 % fetal bovine serum (FBS) and LIF, 1mM sodium pyruvate, non-essential amino acids (Lonza), 2 mM L-glutamate, 7.7 ppm 2-mercaptoethanol on gelatin-coated culture dishes.

For imaging, cells were plated into 8 well  $\mu$ slides (Ibidi) for 10-20% confluency at imaging onset, allowing up to 2 complete cycles to be readily tracked without problems inherent in low culture densities. At higher starting densities it was rare to obtain 2 complete cell generations, due to increased cycle duration and death. Plating was carried out 18h prior to imaging. 2h before imaging, media was replaced. Further experiments compared cells cultured in conventional serum/LIF culture with serum/LIF and 2i (obtained from Philip Cohen). 4h before imaging, media was replaced with fresh conventional or 2i media (Ying et al., 2008). For long term 2i-treatment, H2B-RFP TNGA cells were co-cultured at a 50:50 ratio with parental TNGAs for several passages prior to imaging, to facilitate cell tracking. We used a wide-field fluorescence system designed for fast imaging of photosensitive samples (Stevense et al., 2010; Corrigan and Chubb, 2014). Images were captured using a GFP/mCherry filter set (Chroma 59022), 40x 1.30 NA objective, UV (GG420, Schott) and ND filters (Chroma) to attenuate illumination. Bleed through from red into GFP channel was corrected for post-imaging (see below). For the OCRG9 cells, which express Oct4-CFP in addition to GFP, CFP bleed through was <10% of signal, so of negligible effect on measured correlations. 52 z-slices were acquired with 0.78 $\mu$ m step size and 50-150ms exposure per channel. Stacks were collected every 15 min for up to 72h and 12-14 fields were collected in parallel using a motorized XY stage. Environmental control of CO<sub>2</sub>, temperature and humidity was controlled with a perspex chamber (Digital Pixel) in a temperature-controlled room. 3 independent repeats were carried out for two generation studies, 3 for comparisons of LIF with LIF/2i and Rex1 studies and 2 repeats were used for late passage 2i studies.



### *Data Collection and analysis*

Movies were deconvolved using Volocity with calculated PSFs. Fields-of-view processed without deconvolution or deconvolved using measured PSFs gave similar correlation values. A GUI was developed in MATLAB to record cell tracks. Cell positions were recorded using a mouse click on visually determined nuclear centroids. Lineages of all cells initially in a field-of-view were tracked and coordinates stored in MATLAB arrays. Cells lost/dying during tracking were excluded as they could not contribute to cycle durations. Manual tracking is required to accurately follow lineages for 2 complete cell generations. Tracking was performed by multiple individuals, with cross-checking for reproducibility. Recorded coordinates were used to calculate reporter, H2B-mRFP and background intensity in boxes of 5 x 5 x 3 voxels centred on mouse click coordinates. 5 frames either side of mitosis were removed from fluorescence data due to mitotic shape convolution effects. Compensation for bleed-through used a custom-built function, which also subtracted the background. For FOV calculations, we also used another method for background correction with equivalent results (see SI). Mathematical treatment of the data is described in the SI.

### **Acknowledgements**

Work was supported by a Wellcome Trust Senior Research Fellowship to JRC. We thank Marios Stavridis for advice throughout the project.

### **Author Contributions**

DC, JC carried out experimental work. JC, DC and PM generated reagents. DC, JC, AM carried out cell tracking. DC and AC carried out data analysis. JC, AC and DC wrote the paper.

## Figures

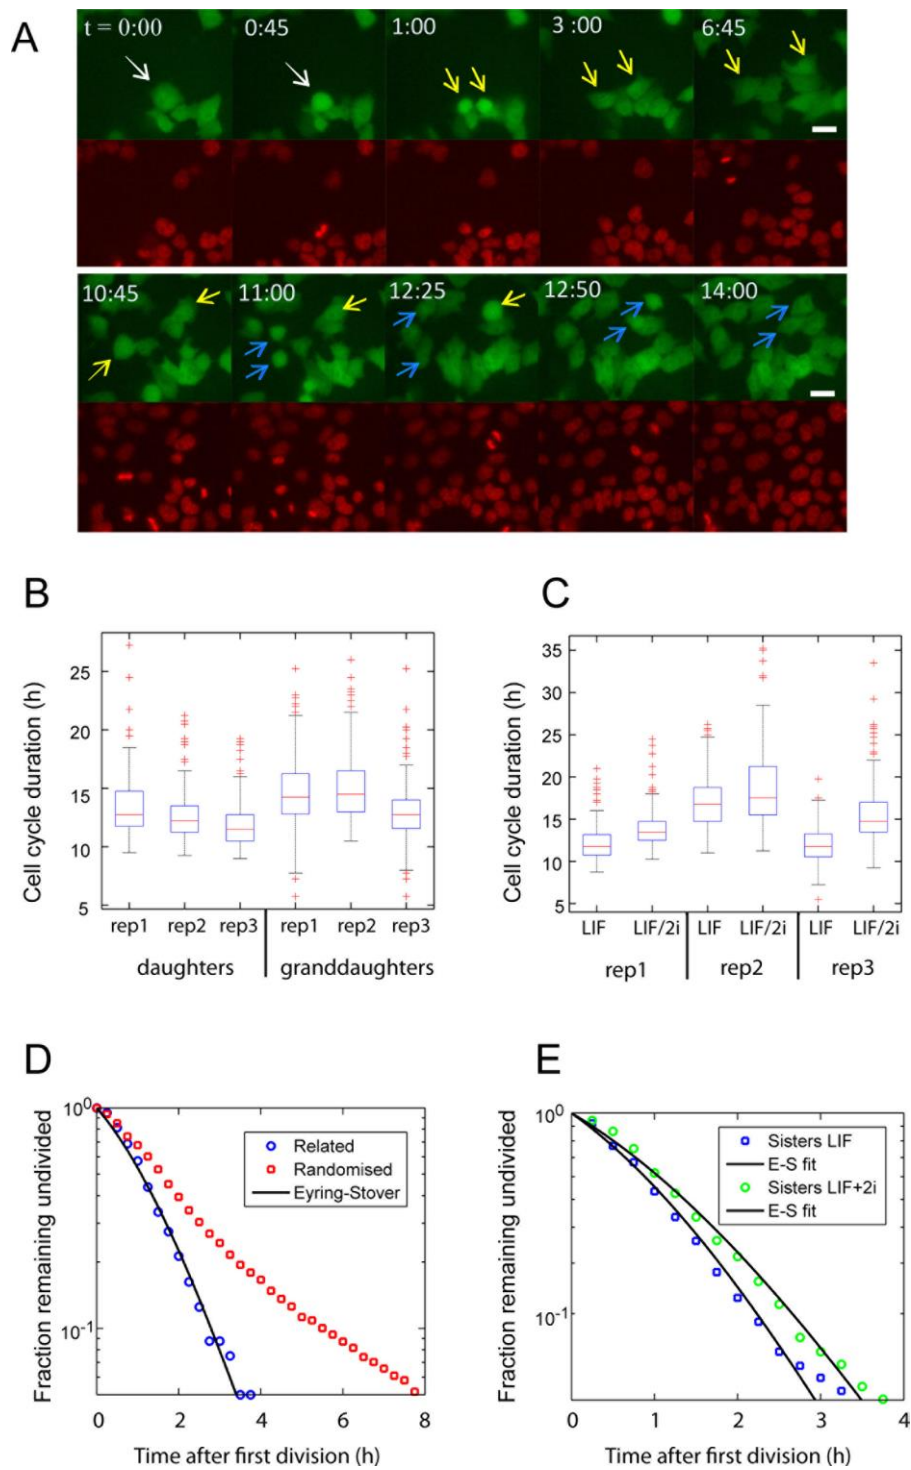

**Figure 1**

Cell cycle heterogeneity and regulation in mouse ESCs.

A) Stills from a movie of mESCs cells expressing GFP from the endogenous Nanog promoter. Cells express H2B-mRFP to aid tracking. Arrows highlight an example lineage

with the mother cell (white), daughters (yellow) and granddaughters (blue). Scale bar 20 $\mu$ m. B) Distributions of cell cycle durations from 3 experiments for daughters (n = 587 lineages) and granddaughters (632 lineages). C) Distributions of cycle durations for daughters in LIF (754 lineages) or LIF/2i (822 lineages). D) Fraction of sister cells remaining undivided after the first sister has divided; showing sisters (blue) and randomised sisters (red)(representative experiment). Fit based on the Eyring-Stover equation (Murphy et al., 1984). E) Comparing inter-division times in LIF (blue) and LIF/2i (green). Data shown with an Eyring-Stover fit. A simple exponential fits poorly to data in D and E.

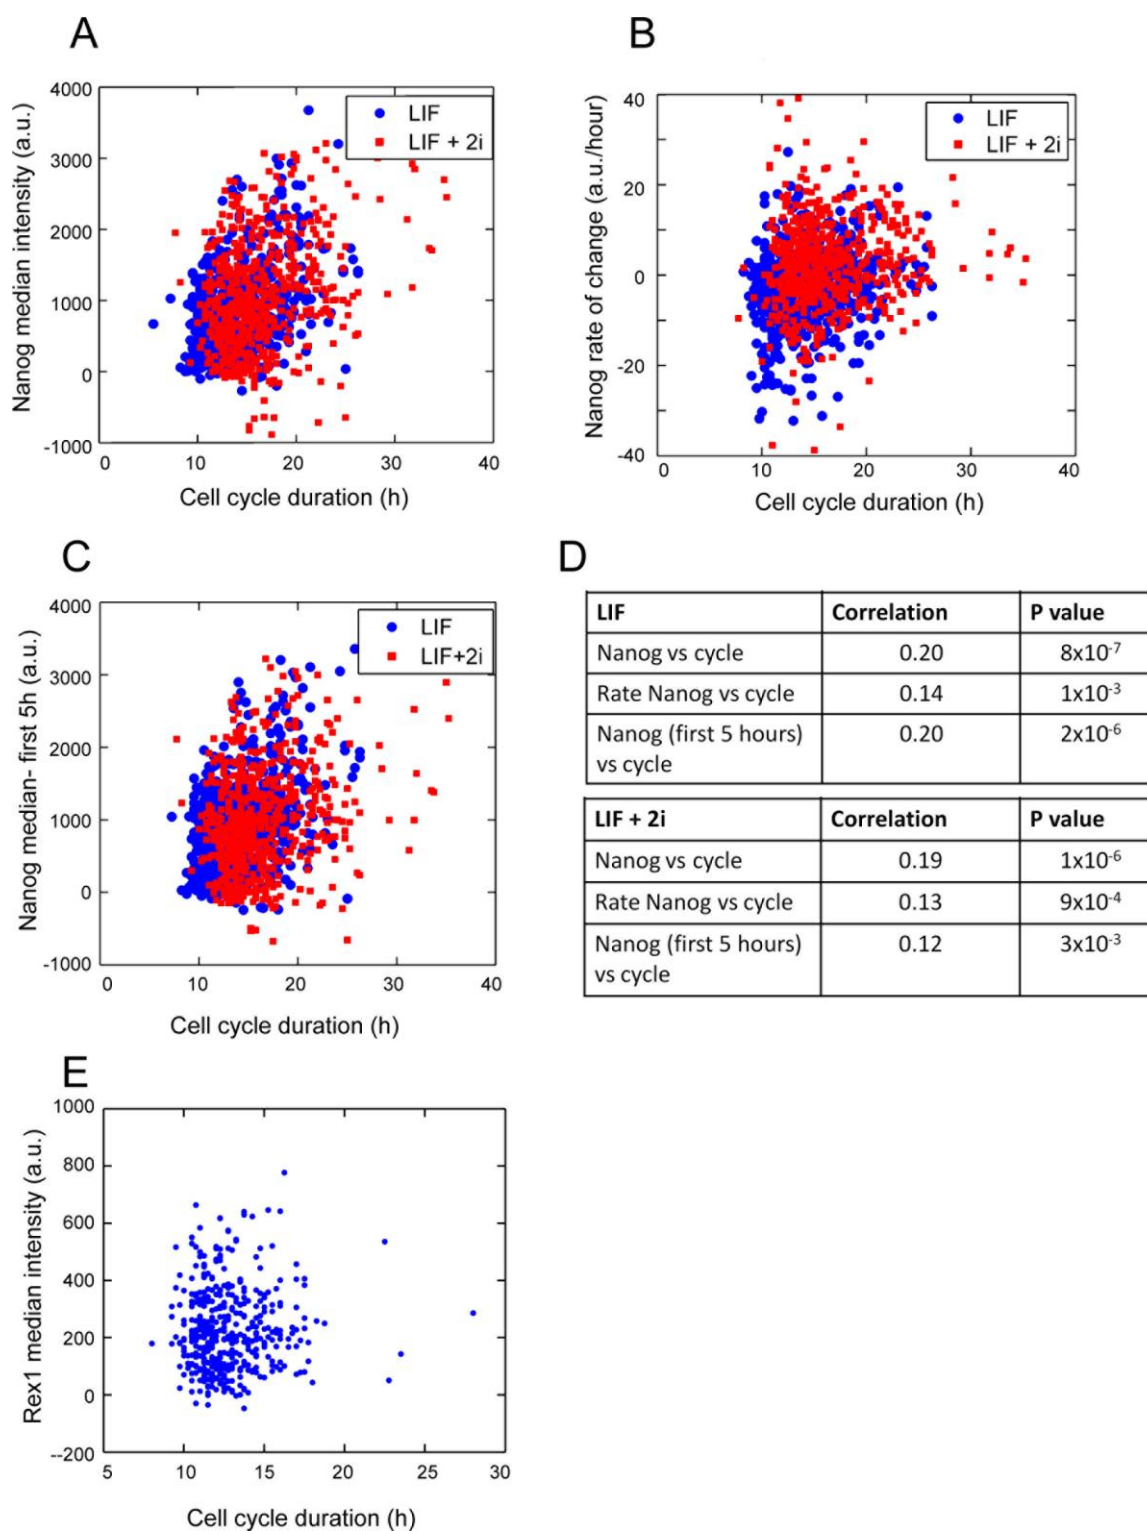**Figure 2**

Pluripotency factor expression and cell cycle dynamics

A) Median expression of Nanog reporter plotted against cycle duration (3 replicates). Daughters in LIF shown with blue circles ( $n = 754$ ), LIF/2i daughters in red ( $n = 822$ ). Cell

lineages in both conditions show correlations between cell cycle duration and gene expression. B) Nanog rate of change versus cycle duration for LIF (blue) and LIF/2i (red). C) Nanog level from the first 5h of cycles, plotted against cycle duration for daughters in LIF (blue) and LIF/2i (red). D) Summary of correlation and related p values for plots A-C, from 3 pairwise experiments comparing LIF with 2i/LIF. Correlation values from multi-generation lineages described in the text. E) Rex1-GFP expression plotted against cycle duration (434 cells, 3 replicates,  $r=-0.005$ ).

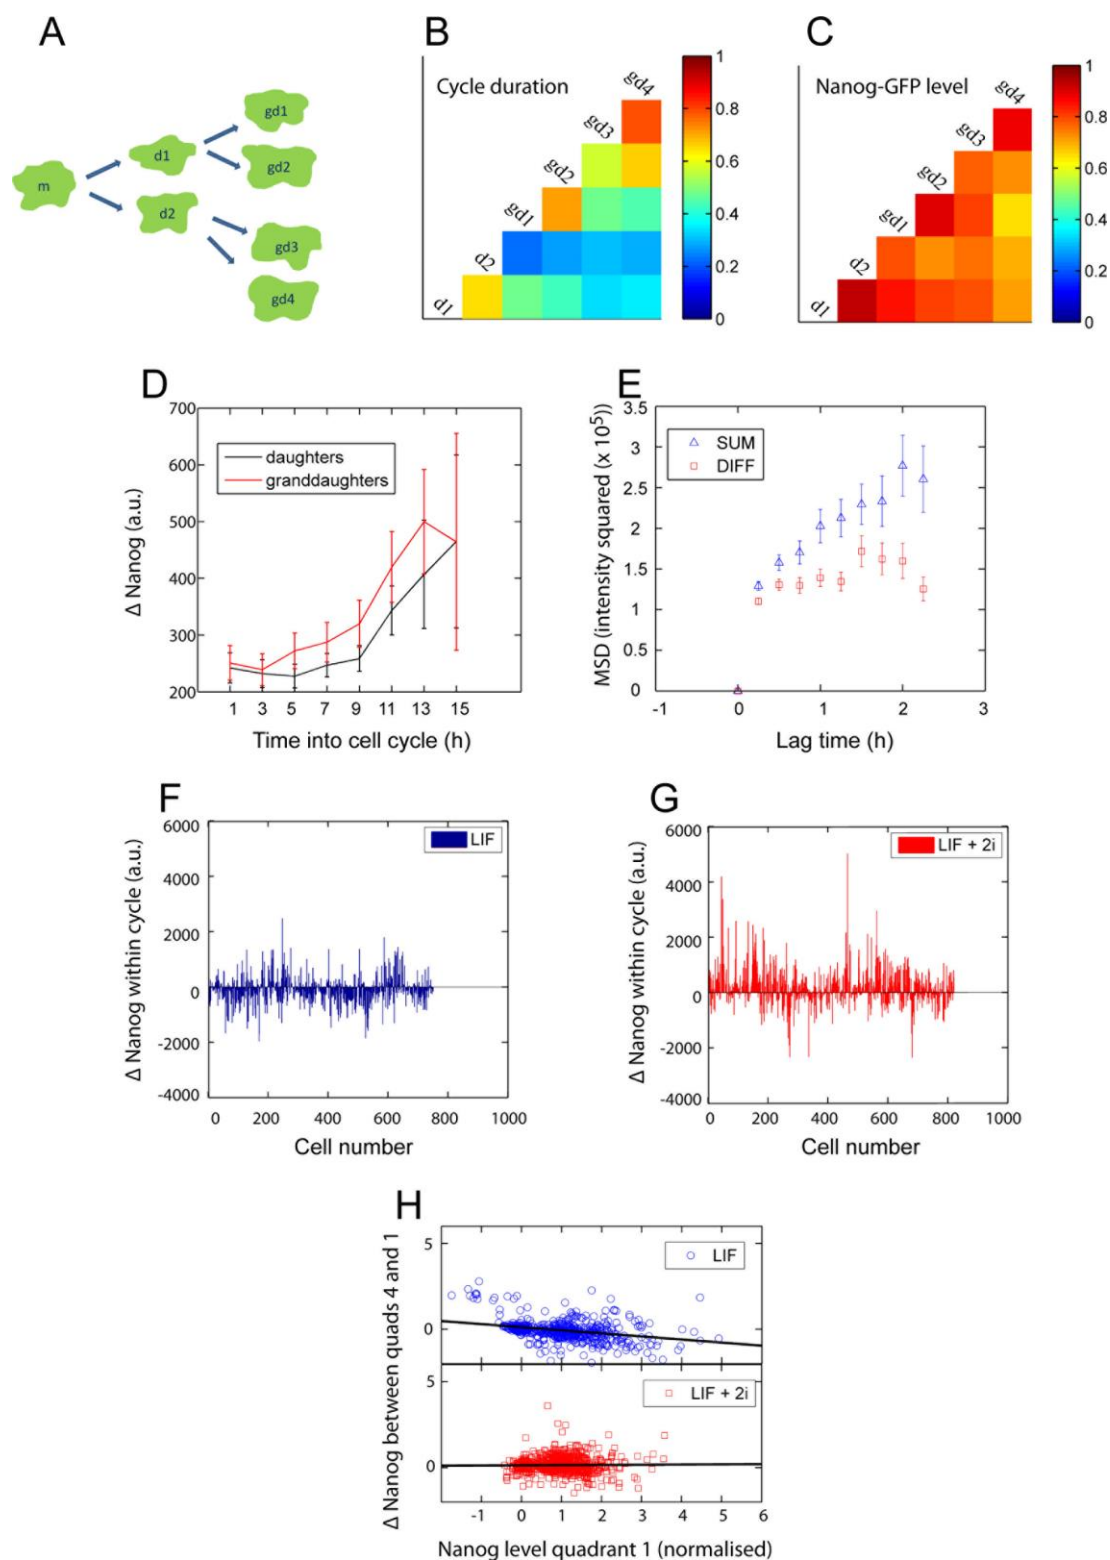**Figure 3**

Regulation of heterogeneity by lineage and cell state.

A) Schematic of cell lineages. Daughter 1 divides into granddaughter 1 and 2; daughter 2 into granddaughter 3 and 4. B) Heatmap of correlations in cycle duration between related cells C)

Heatmap of correlations in Nanog expression between related cells. Data in B and C are representative; repeats in Figure S2. Red shows strong positive correlations, blue weak positive correlations D) Difference in Nanog reporter between sisters over complete cycles. Bars SD. E) The mean squared deviations of correlated (sum of Nanog values of daughters) and anti-correlated (difference of Nanog values of daughters), showing sisters have correlated fluctuations. Bars SEM. F) Difference in Nanog reporter between start and end of cell cycles for each daughter. Cells increase and decrease over a cell cycle in LIF. Increases predominate in 2i (G), although strong decreases also occur. H) High reporter expression predicts a decline in subsequent reporter expression. Cell cycles were divided into 4 equal quadrants (Q1 at cycle onset and Q4 at the end). Plots show the difference in Nanog intensity between Q4 and Q1 versus Q1 intensity. Gradients measured using a robust linear least squares method, with bisquare weighting. For LIF we observed a negative gradient, which increased in 2i. Units for Nanog are GFP intensity with mean population GFP subtracted, then divided by the SD.



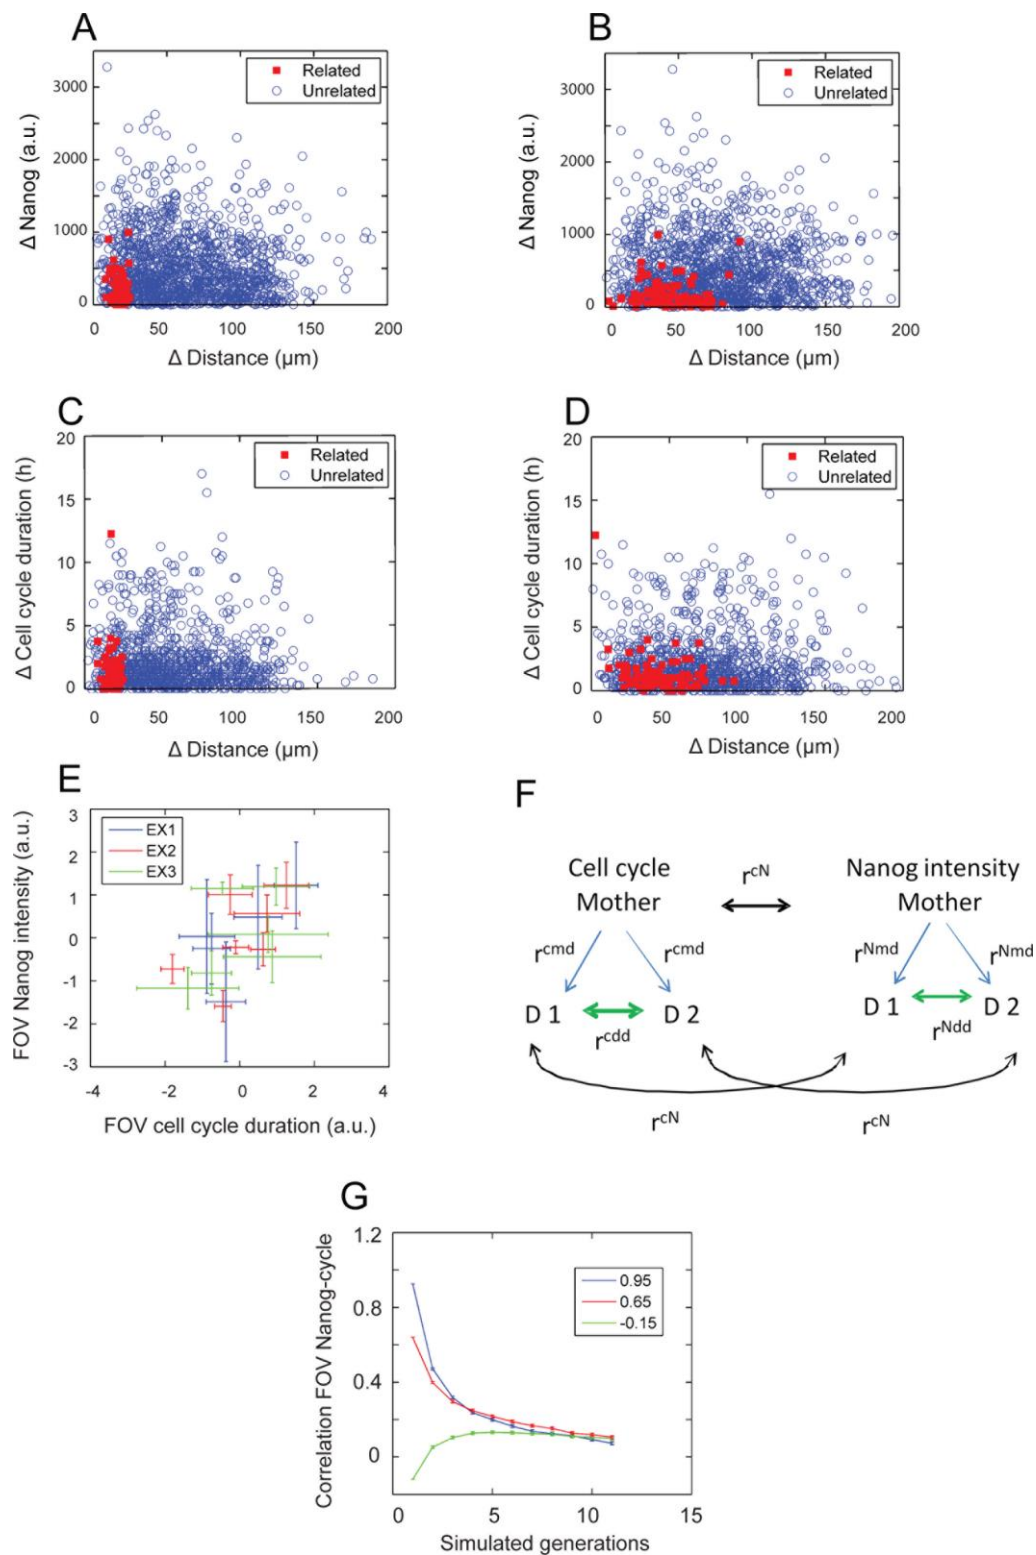**Figure 4**

Regulation of ESC heterogeneity by local environment

A-D compare intercellular distance and differences in Nanog expression (A,B) and cell cycle duration (C,D) for a representative experiment. Distances between related (red) and unrelated

(blue) daughters at birth (A,C) and subsequent mitosis (B,D). See Figure S3A and B for replicates. E) Field-of-view (FOV) average cycle time plotted against field average GFP intensity (3 experiments; 18 FOVs ( $r=0.6$ ). Each experiment shown in a different colour. Data from repeats normalised to the same mean and SD. Correlations between cycle time and expression were higher in FOV than single cells. F) A simple model where daughter cells inherit Nanog and cycle behaviour directly from mothers using experimentally determined correlation values, simulating the changing correlations between cell cycle and Nanog based upon the lineage of one founder cell ( $r$  = correlation,  $m$  = mother,  $d$  =daughter,  $N$  =Nanog level,  $c$  =cycle duration). G) Multigenerational simulation of the model, assuming all cells in a FOV derived from one founder. Values on the vertical axis are FOV correlations between cycle duration and GFP (curves for different hypothetical starting correlations shown). For experimental data, imaging began at around 10-30 cells for two cell cycles, corresponding to generations 5-6 in the figure. Correlations at generation 5-6 were higher in experimental data than simulations, regardless of starting correlation level, consistent with local environment stabilising cell behaviour.

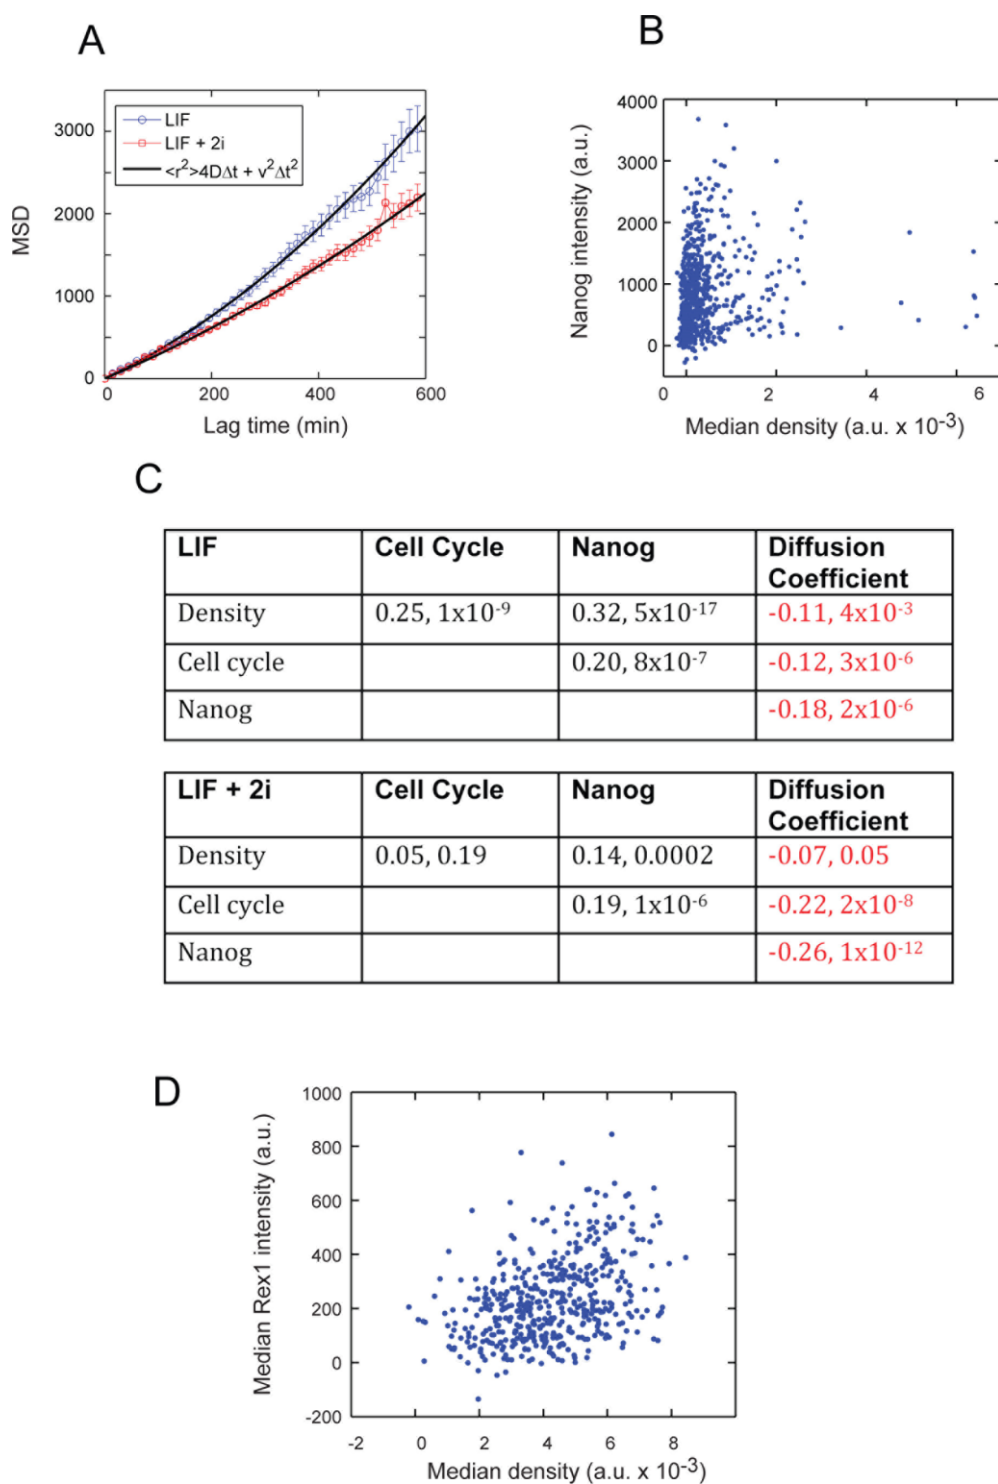

**Figure 5**

Multiple interactions with cell density.

A) Cell movement in LIF and LIF + 2i can be described by active transport with a diffusion and drift movement. Typical MSDs shown from LIF and LIF/2i movies; bars SEM. No consistent differences in diffusion between LIF and LIF + 2i, with pooled means 1.13

$\mu\text{m}^2/\text{min}$  (LIF) and  $0.98 \mu\text{m}^2/\text{min}$  (LIF/2i) (3 replicates). B) Median density (over the cell cycle) correlates with Nanog reporter. C) Correlation values between density, cycle duration, Nanog and diffusion coefficient (motility) of daughters in LIF or LIF /2i. Multigeneration data described in main text. D) Comparing density and Rex1 reporter level ( $r = 0.22$ ).

## References

- Abranches, E., Guedes, A. M., Moravec, M., Maamar, H., Svoboda, P., Raj, A. and Henrique, D. (2014) 'Stochastic NANOG fluctuations allow mouse embryonic stem cells to explore pluripotency', *Development* 141(14): 2770-9.
- Brooks, R. F. (1981) 'Random transitions and cell cycle control', *Prog Clin Biol Res* 66 Pt A: 593-601.
- Brooks, R. F., Bennett, D. C. and Smith, J. A. (1980) 'Mammalian cell cycles need two random transitions', *Cell* 19(2): 493-504.
- Budirahardja, Y. and Gonczy, P. (2009) 'Coupling the cell cycle to development', *Development* 136(17): 2861-72.
- Chambers, I., Colby, D., Robertson, M., Nichols, J., Lee, S., Tweedie, S. and Smith, A. (2003) 'Functional expression cloning of Nanog, a pluripotency sustaining factor in embryonic stem cells', *Cell* 113(5): 643-55.
- Chambers, I., Silva, J., Colby, D., Nichols, J., Nijmeijer, B., Robertson, M., Vrana, J., Jones, K., Grotewold, L. and Smith, A. (2007) 'Nanog safeguards pluripotency and mediates germline development', *Nature* 450(7173): 1230-4.
- Corrigan, A. M. and Chubb, J. R. (2014) 'Regulation of transcriptional bursting by a naturally oscillating signal', *Current biology : CB* 24(2): 205-11.
- Di Talia, S., Skotheim, J. M., Bean, J. M., Siggia, E. D. and Cross, F. R. (2007) 'The effects of molecular noise and size control on variability in the budding yeast cell cycle', *Nature* 448(7156): 947-51.
- Faddah, D. A., Wang, H., Cheng, A. W., Katz, Y., Buganim, Y. and Jaenisch, R. (2013) 'Single-cell analysis reveals that expression of nanog is biallelic and equally variable as that of other pluripotency factors in mouse ESCs', *Cell stem cell* 13(1): 23-9.
- Hayashi, K., Lopes, S. M., Tang, F. and Surani, M. A. (2008) 'Dynamic equilibrium and heterogeneity of mouse pluripotent stem cells with distinct functional and epigenetic states', *Cell stem cell* 3(4): 391-401.
- Huang, S. (2011) 'Systems biology of stem cells: three useful perspectives to help overcome the paradigm of linear pathways', *Philosophical transactions of the Royal Society of London. Series B, Biological sciences* 366(1575): 2247-59.
- Huang, S., Eichler, G., Bar-Yam, Y. and Ingber, D. E. (2005) 'Cell fates as high-dimensional attractor states of a complex gene regulatory network', *Physical review letters* 94(12): 128701.
- Kalmar, T., Lim, C., Hayward, P., Munoz-Descalzo, S., Nichols, J., Garcia-Ojalvo, J. and Martinez Arias, A. (2009) 'Regulated fluctuations in nanog expression mediate cell fate decisions in embryonic stem cells', *PLoS Biol* 7(7): e1000149.
- Kumar, R. M., Cahan, P., Shalek, A. K., Satija, R., DaleyKeyser, A. J., Li, H., Zhang, J., Pardee, K., Gennert, D., Trombetta, J. J. et al. (2014) 'Deconstructing transcriptional heterogeneity in pluripotent stem cells', *Nature* 516(7529): 56-61.
- Li, V. C., Ballabeni, A. and Kirschner, M. W. (2012) 'Gap 1 phase length and mouse embryonic stem cell self-renewal', *Proceedings of the National Academy of Sciences of the United States of America* 109(31): 12550-5.
- Li, V. C. and Kirschner, M. W. (2014) 'Molecular ties between the cell cycle and differentiation in embryonic stem cells', *Proceedings of the National Academy of Sciences of the United States of America* 111(26): 9503-8.
- Miyazari, Y. and Torres-Padilla, M. E. (2012) 'Control of ground-state pluripotency by allelic regulation of Nanog', *Nature* 483(7390): 470-3.
- Muramoto, T. and Chubb, J. R. (2008) 'Live imaging of the Dictyostelium cell cycle reveals widespread S phase during development, a G2 bias in spore differentiation and a premitotic checkpoint', *Development* 135(9): 1647-57.

- Muramoto, T., Muller, I., Thomas, G., Melvin, A. and Chubb, J. R. (2010) 'Methylation of H3K4 Is required for inheritance of active transcriptional states', *Current biology : CB* 20(5): 397-406.
- Murphy, J. S., Landsberger, F. R., Kikuchi, T. and Tamm, I. (1984) 'Occurrence of cell division is not exponentially distributed: differences in the generation times of sister cells can be derived from the theory of survival of populations', *Proceedings of the National Academy of Sciences of the United States of America* 81(8): 2379-83.
- Plusa, B., Piliszek, A., Frankenberg, S., Artus, J. and Hadjantonakis, A. K. (2008) 'Distinct sequential cell behaviours direct primitive endoderm formation in the mouse blastocyst', *Development* 135(18): 3081-91.
- Pour, M., Pilzer, I., Rosner, R., Smith, Z. D., Meissner, A. and Nachman, I. (2015) 'Epigenetic predisposition to reprogramming fates in somatic cells', *EMBO reports* 16(3): 370-8.
- Sharma, S. V., Lee, D. Y., Li, B., Quinlan, M. P., Takahashi, F., Maheswaran, S., McDermott, U., Azizian, N., Zou, L., Fischbach, M. A. et al. (2010) 'A chromatin-mediated reversible drug-tolerant state in cancer cell subpopulations', *Cell* 141(1): 69-80.
- Sigal, A., Milo, R., Cohen, A., Geva-Zatorsky, N., Klein, Y., Liron, Y., Rosenfeld, N., Danon, T., Perzov, N. and Alon, U. (2006) 'Variability and memory of protein levels in human cells', *Nature* 444(7119): 643-6.
- Singer, Z. S., Yong, J., Tischler, J., Hackett, J. A., Altinok, A., Surani, M. A., Cai, L. and Elowitz, M. B. (2014) 'Dynamic heterogeneity and DNA methylation in embryonic stem cells', *Molecular cell* 55(2): 319-31.
- Stevenson, M., Muramoto, T., Muller, I. and Chubb, J. R. (2010) 'Digital nature of the immediate-early transcriptional response', *Development* 137(4): 579-84.
- Toyooka, Y., Shimosato, D., Murakami, K., Takahashi, K. and Niwa, H. (2008) 'Identification and characterization of subpopulations in undifferentiated ES cell culture', *Development* 135(5): 909-18.
- Waddington, C. H. (1957) *The Strategy of the Genes; a Discussion of Some Aspects of Theoretical Biology*, London: Allen & Unwin.
- Wullstein, L. H., Bjorklund, R. and Eyring, H. (1980) 'Application of the Eyring-Stover survival theory to soil-related functions', *Proceedings of the National Academy of Sciences of the United States of America* 77(7): 3767-8.
- Xenopoulos, P., Kang, M. and Hadjantonakis, A. K. (2012) 'Cell lineage allocation within the inner cell mass of the mouse blastocyst', *Results and problems in cell differentiation* 55: 185-202.
- Xenopoulos, P., Kang, M., Puliafito, A., Di Talia, S. and Hadjantonakis, A. K. (2015) 'Heterogeneities in Nanog Expression Drive Stable Commitment to Pluripotency in the Mouse Blastocyst', *Cell reports*.
- Ying, Q. L., Wray, J., Nichols, J., Battle-Morera, L., Doble, B., Woodgett, J., Cohen, P. and Smith, A. (2008) 'The ground state of embryonic stem cell self-renewal', *Nature* 453(7194): 519-23.
